# Supplementary material for: Performance of the Cas9 Nickase System in Drosophila melanogaster
Source: PubMed Central journal article supplement (PMC4199701; doi:10.1534/g3.114.013821), 2014-08-15
Supplement: supp_g3.114.013821_013821SI.pdf [file supp_g3.114.013821_013821SI.pdf]

**Performance of the Cas9 nickase system in *Drosophila melanogaster***

Xingjie Ren<sup>\*1</sup>, Zhihao Yang<sup>\*1</sup>, Decai Mao<sup>\*1</sup>, Zai Chang<sup>§,1</sup>, Huan-Huan Qiao<sup>\*1</sup>, Xia Wang<sup>\*1</sup>, Jin Sun<sup>\*</sup>, Qun Hu<sup>†</sup>, Yan Cui<sup>\*</sup>,  
Lu-Ping Liu<sup>\*,†</sup>, Jun-Yuan Ji<sup>‡</sup>, Jiang Xu<sup>\*,\*\*,§§,2</sup>, and Jian-Quan Ni<sup>\*,2</sup>

<sup>\*</sup>Gene Regulatory Lab, School of Medicine, <sup>§</sup>School of Life Sciences, and <sup>†</sup>Tsinghua Fly Center, Tsinghua University, Beijing 100084, China; <sup>‡</sup>Department of Molecular and Cellular Medicine, College of Medicine, Texas A&M Health Science Center, College Station, Texas 77843, USA; <sup>\*\*</sup>School of Basic Medical Sciences, Wuhan University, Wuhan 430071, China; <sup>§§</sup>College of Bioengineering, Hubei University of Technology, Wuhan 430068, China

<sup>1</sup>These authors contributed equally to this work

<sup>2</sup>Corresponding authors

DOI: 10.1534/g3.114.013821

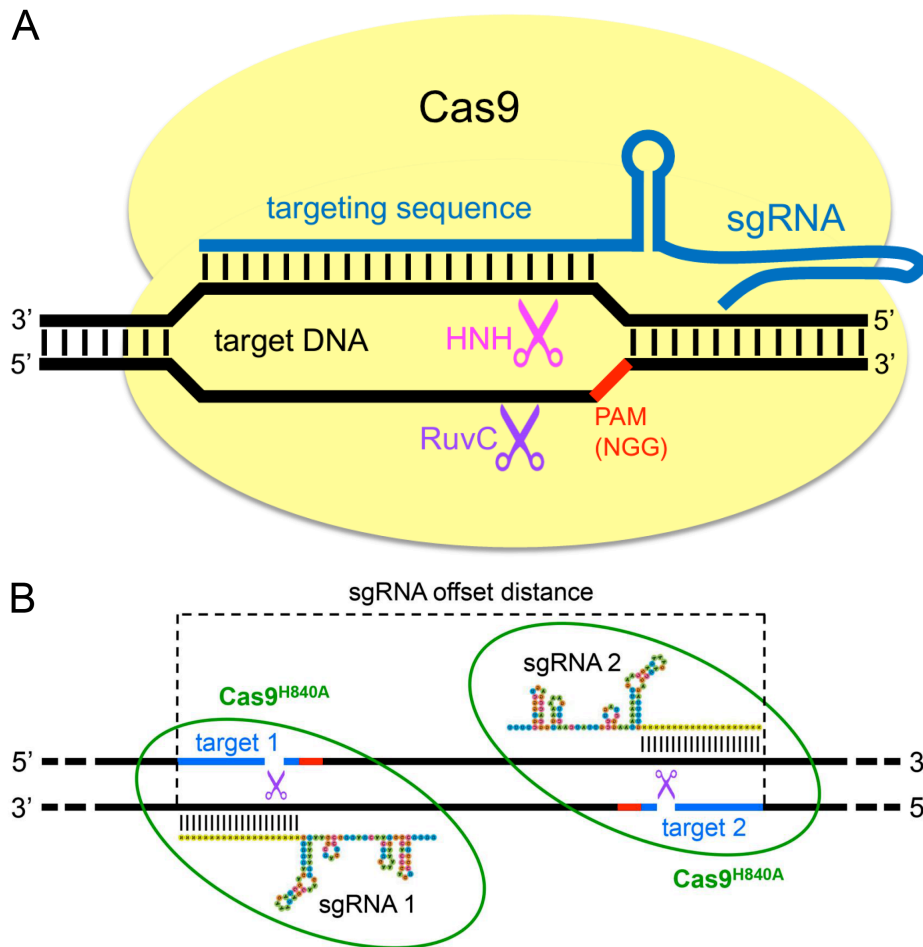

**Figure S1. Models of Cas9 nuclease or Cas9<sup>H840A</sup> nickase in introducing DSBs in DNA.** (A) Schematic of the Cas9/sgrNA system in introducing DNA DSBs. Cas9 is shown in yellow and the chimeric sgrNA is shown in blue. The Cas9/sgrNA ribonucleoprotein recognizes the target double-stranded DNA by a 20nt complementary targeting sequence. A three nucleotide PAM sequence (NGG) is also required in the DNA for Cas9/sgrNA targeting, and is shown in red. Cas9 then introduces DSBs with the two nuclease domains. The HNH domain cuts the complementary strand to the sgrNA (magenta scissors), and the RuvC domain cuts the non-complementary strand (purple scissors). (B) Diagram showing two neighboring Cas9<sup>H840A</sup>/sgrNA ribonucleoproteins targeting the fly genome. The H840A mutation converts Cas9 into a nickase that targets only the strand that is not complementary to the sgrNA. Each Cas9<sup>H840A</sup> nickase is shown as a green circle. The sgrNA targets are shown in blue and the PAMs in red. The single-strand nicks are shown by the purple scissors. The offset distance is measured from the PAM-distal end of an sgrNA target to that of the other. If the PAMs are facing inward towards each other as shown in this diagram, the distance is a negative number.

GCTGCAAGGCGATTAAGTTGGGTAACGCCAGGGTTTTCCAGTCACGACGTTGTAACACGACGGCCAGTGAATTGTAATACGA  
CTCACTATAGGGCGAATTGGGTACAAGCTTATTTATTTTGTATGTTATATGTATTATATGTGACACATAAAGAAAAGGAACA  
CATCAAATGTGATAACAAAGACTAAACAAGTAATTTTTATTACACAAAACGACAAAACAGTAGGCAGAACAAAACGCATAG  
CCAAACATTGACGAATTGGATACCCCTGCCGATTGTGACACTTTTGTGTGATCAGTTTCTTGCGAATGGTCTCGTCCAGCGGT  
GGAATCGCCTCGCGGGGAATCAGAAAAGTGGACAGATTGAACAGATCCAGAAAACCTTGTACCGATCACTGAAACCAAAAA  
AAACAAAGGGAACAGTTTGGATTGATCCCGATATAATCACATCTGCGATGATCACCTGAGAGTGGAGCGCAGATAT  
TGATAACCAGACGAGCCACCAGTGCCTCACTGTTGCGATCCAATCATGCGTTGCACCATGATCACGTGATTGTCTGCGGCGGG  
AATAGAAAAGTATTTGGTTAGGAAAACCAGTCTTAAACATAAGATATATTTATAAAAAGAGTATCAAAGAATGCAATACTTACAT  
CTCCACTTGGTTATTAACGAGTCGATGTCATGAGCAGGGTGAACAACCTGGTGTGGTTGGCTGAACTGGGTTTATCCCTATA  
GAAGGTGATCATGATGGTCCCTGAAGGGCAGATGGCTAAACCGCGATCCACGACGACCCAGTGCATCGTGCCTGCGG  
GATCAAAGATGGAGCGATACACCTCGCGTCTTCAATGTCCATGAGCGGTAGTTTTTTCGCTTCTCCACGGGCTCCTCC  
ATGGCGCTCTGTACCTGCGCTCCAGGAATCGATCGACGCTCTCTGAACTTGGCCAGAAAGTTGAAGCCACTCTCCTCCAG  
TCCGGGCGTCTCTCCAGCCATCGCTGCACTAGCTCCAGTAGCGAGGGATCTTCTCCGAGTTGCGAATCGAGTCCGCGCCT  
CCTCGTCTGATAAAGACATCCGAGTACTTCTGGTTGTATCTCACCCGCTGCTCTGTGCAACTCCAGCTTGTCTCGATCAA  
CGGAATGCAGCGACTGAAAACCAGATGCGGGTGCAGGTAAGTTCGCGAAGTCCATGAAGTCTAGCGGGGTCATGGTCTCCAG  
AATGGGCACTTGGTCCACCAGGAGCTGTACAAAGGAAGTTATAAACGGATTTGGTAAGAGATTAGAAAGCACTCACTTTTA  
GAATCAGAACCACTCGGTTGAGTCTGACAATCTCCAGCGTCTGGTTTTCATCGATGACCTCTGCATCCAACATGTCTCGT  
ATGGAGTCAACTCAAAGATGATCTGCTTGAACCAAGCTCGTAGGCTGTGGCAAGGTAAGTAAATGCCATTGAGTGTGTC  
ATCAAAGTTGTAACCTACTCACCTGGTGCCTGATGATGAACAGATGCTCATCGTGCACGGGTCGCTTGTCTCTCGGACA  
GCATACACTGGGCATCCAGCAGTTTGTCCAGCATCAGATACTCTCCATAGATTTTGGCCACTTCCGTGGTTAATGGCACC  
GAATCATCGTATCGTTTCTGTATGGGTTGAATTGAATCGCAGAACTGAAGATCGATTGGCATTCTGGACAGCAGTGTCTG  
GTGCTCACCCGTTTCTGCATAGGGACAGCTCATGGTGCACAGCTCAGATCAGATCGTACTCTCGACCGGCGGATGCTGGC  
GAACTGATCTCCGCCAGCGACCGGAGATGAGACCCGAGCAACCGATAACAGAGCGAGAGAGCTCCAGTCCGACTGATTGC  
ACAGTCGGTGTCTGGGCGATGGGCACTGCCAGATAGGCTGGGAATTATCAATCACTTGAGGTGAAAGTGGGCGCACACAAA  
TCCAAGCTTGATATCATCGATCTCGACGCTGCATCCAACGCGTTGGGAGCTCTCCGGATCAATTCGGCTTCCAGTACCGTCA  
CGATGTAGGTACGGTCTCGAAGCCGCGGTGCGGGTGCAGGGCGTGCCTTGGGCTCCCGGGGCGTACTCCACCTCACCC  
ATCTGGTCCATCATGATGAACGGGTGAGGTGGCGGTAGTTGATCCCGGCAACGCGCGGCGCACCGGGAAGCCCTCGCCCTC  
GAAACCGCTGGGCGCGGTGGTACGGTGCAGCGGGACGTCGACGCGGCTCGGCTGGTGGGATAACGCGGGGCGAGCTCAGCG  
GGTCTCGACGGTACGGCGGGCATGTCGACAAGCCGAATTGATCCACTAGAAGGCCTAATTCGtCTAGCAGGATCTctaggG  
CTTCGACCGTTTTAACCTCGAAATATGCACATGTAAGGACGGATGTGAGCGAACGCCAGTGTGACCGGGATCAGAGGTAACC  
TACCATGGTGGGATTAGGTGACCGTTTCGAGGTAGTTTGTGAGCGGAATGTTCCGGGGGCTGGCGTCAGAGGCTCTAAA  
CTTTATGTAATTTCTGCCGGAACACGCACGATCAAGCAGTCAGCTGTTCTCTTCGTTAGCGCGCGCCGGTGTGCAAAA  
CGAGCGCTCTTCGCCGCGGTGGCTCGTGCATAGTTCGTTTTGTGCGTAATCCGATGTTGCCGCGCCGATATCATGTGATGT  
TGTCACAGTGGCGAAATTCGAATGGTGGTGTGACGATGTTGTTGTGACGGCGAGTGGCGCGTGTGGGTGCTTAGTTTTGG  
GAGATGTTTTCGTATTTTTTTGTTGATAACTCAGGCTTTGTTGCTGTGTTGTAGTACTATTTTCCATTGCGCGGTGTCCAGCT  
TTTAATTAGTGGCACATATCTTAGCAAGTAAAAATTAATTTGCATACTATTAATTTCTTATAAATTAATTTCTAAAATTA  
GTTTACCTTTTCAATTTTACTAAAAATATCGATATATTTATATCGCTGGAACACTACATTATTCACCTTAAGCAAGAACC  
GTTAGTTGGCGGTAGCTTTACCACAAAATTCCTGGAATTCGCTAGCCTTCGAGTGTGTTCAAGTTGTCTAAGGGACATA  
GATTTTTTTTGCCTCTGCGTCACGATTTTAAACCAAAAGCGAGTTTAGTTACATGTACATTATTAATAGATAAAGAAGTATCG  
CGAATACTTCAGTTGAATAAACTGTGCTTGGTTTTTGGGTGAGGATTTGTGAAAGTAGAGTGGCGGATAACCGTAACCTTTCG  
ACCCGGATTTTCGCTgAATTgagatetcTCTAGAggtacCGCCACCATGGCCCCAAGAAGAAGCGGAAGGTGCGGTATCCAC  
GGTGTCCAGCAGCCATGGACAAGAAGTACTCCATTGGGCTC**GCT**ATCGGCACAAACAGCGTCCGCTGGGCGCTCATTACGGA  
CGAGTACAAGGTGCCGAGCAAAAATTCAAAGTTCTGGCAATACCGATCGCCACAGCATAAAGAAGAACCCTATTGGCGCCC  
TCCTGTTTCGACTCCGGGAGACGGCCGAAGCCACGCGGCTCAAAGAACAGCAGCGCGCAGATATACCCGAGAAAGAATCGG  
ATCTGTACTCGCAGGAGATCTTTAGTAATGAGATGGTAAAGGTGGATGACTCTTTCTTCCATAGGCTGGAGGAGTCTTTTT  
GGTGGAGGAGATAAAAAGCACGAGCGCCACCAATCTTTGGCAATATCGTGGACGAGGTGGCGTACCATGAAAAGTACCCAA  
CCATATATCATCTGAGGAAGAAGCTTGTAGACAGTACTGATAAGGCTGACTTGCGGTTGATCTATCTCGCGCTGGCGCATATG  
ATCAAATTTCCGGGACACTTCTCATCGAGGGGACCTGAACCCAGACAACAGCGATGTCGACAAACTCTTTATCCAACCTGGT  
TCAGACTTACAATCAGCTTTTCAAGAGAACCCGATCAACGCATCCGGAGTTGACGCCAAAGCAATCTTGAGCGCTAGGCTGT  
CCAAATCCCGGCGGCTCGAAAACCTCATCGCACAGCTCCCTGGGAGAGAAGAAGCGGCTGTTTGGTAATCTTATCGCCCTG  
TCACTCGGGCTGACCCCAACTTTAAATCTAACTTCGACTTGGCCGAAGATGCCAAGCTTCAACTGAGCAAAGACACCTACGA  
TGATGATCTCGACAATCTGCTGGCCAGATCGGCGACCAGTACGCAGACCTTTTTTTGGCGGCAAGAACCCTGTCAGACGCCA  
TTCTGCTGAGTATATCTGCGAGTGAACACGGAGATCAACAAAGCTCCGCTGAGCGCTAGTATGATCAAGCGCTATGATGAG  
CACCACCAAGACTTGACTTTGCTGAAGGCCCTTGTGACAGCAACTGCCTGAGAAGTACAAGGAAATTTTCTCGATCAGTC  
TAAAAATGGCTACGCCGATAACATTGACGGCGGAGCAAGCCAGGAGGAATTTACAAATTTATTAAGCCCATCTTGAAAAA  
TGGACGGCACCGAGGAGTCTGTTGTAAGCTTAACAGAGAAGATCTGTTGCGCAAACAGCGCACTTTGACAATGGAAGCATC  
CCCCACCAGATTCACCTGGGCGAAGTGCAGCTATcCTCAGCGGCAAGAGGATTTCTACCCCTTTTTGAAAGATAACAGGGA  
AAAGATTGAGAAAATCTCACATTTCCGATACCTACTATGTAGGCCCTTCGCCGGGAAATTCAGATTCCGCTGGATGA

CTCGCAAATCAGAAGAGACCATCACTCCCTGGAACCTCGAGGAAGTCGTGGATAAGGGGGCCTCTGCCAGTCCTTCATCGAA  
AGGATGACTAACTTTGATAAAAAATCTGCCTAACGAAAAGGTGCTTCCTAAACACTCTCTGCTGTACGAGTACTTCACAGTTTA  
TAACGAGCTACCAAGGTCAAATACGTCACAGAAGGGATGAGAAAGCCAGCATTCTGTCTGGAGAGCAGAAGAAAGCTATCG  
TGGACCTCTCTTCAAGACGAACCGGAAAAGTTACCGTGAAACAGCTCAAAGAAGACTATTTCAAAAAGATTGAATGTTTCGAC  
TCTGTTGAAATCAGCGGAGTGGAGGATCGCTTCAACGCATCCCTGGGAACGTATCACGATCTCTGAAAATCATTAAGACAA  
GGACTTCTGGACAATGAGGAGAACGAGGACATTCTTGAGGACATTGTCTCACCCCTTACGTTGTTTGAAGATAGGGAGATGA  
TTGAAGAACGCTTGA AAACTTACGCTCATCTCTTCGACGACAAAAGTCATGAAAACAGCTCAAGAGGCGCCGATATACAGGATGG  
GGCGGCTGTCAAGAAAATGATCAATGGGATCCGAGACAAGCAGAGTGGAAAAGACAATCCTGGATTTTCTTAAGTCCGATGG  
ATTTGCCAACCGGAACCTCATGCAGTTGATCCATGATGACTCTCTCACCTTTAAGGAGGACATCCAGAAAAGCACAAGTTTCTG  
GCCAGGGGACAGTCTTACGAGCACATCGTAATCTTGCAGGTAGCCAGCTATCAAAAAGGGAATACTGCAGACCGTTAAG  
GTCGTGGATGAACTCGTCAAAGTAATGGGAAGGCATAAGCCCAGAAATATCGTTATCGAGATGGCCCGAGAGAACCAAACCTAC  
CCAGAAGGGACAGAAGAACAGTAGGGAAAAGGATGAAGAGGATTGAAGAGGGTATAAAAAGAACTGGGGTCCCAAATCTTAAGG  
AACACCCAGTTGAAAACACCCAGCTTCAAGATGAGAAGCTCTACCTGTACTACCTGCAGAACGGCAGGGACATGTACGTGGAT  
CAGGAACTGGACATCAATCGGCTCTCCGACTACGACGTGGATGCTATCGTGGCCAGTCTTTTCTCAAAGATGATTCTATTGA  
TAATAAAGTGTGACAAGATCCGATAAAAAATAGAGGGAAGAGTGATAACGTCCCTCAGAAGAAGTTGTCAAGAAAATGAAAA  
ATTATTGGCGGACAGTCTGTAACGCCAACTGATCACACAACGGAAGTTCGATAATCTGACTAAGGCTGAACGAGGTGGCCCTG  
TCTGAGTTGGATAAAGCGGCTTCATCAAAGGCAGCTTGTGAGACACGCCAGATCACCAAGCACGTGGCCCAAATCTCGA  
TTCACGCATGAACACCAAGTACGATGAAAATGACAACTGATTTCGAGAGGTGAAAAGTTATTACTCTGAAGTCTAAGCTGGTCT  
CAGATTTAGAAAAGGACTTTTCAAGTTTATAAGGTGAGAGAGATCAACAATTACCACCATGCGCATGATGCCACTGAAATGCA  
GTGGTAGGCACTGCATTATCAAAAAATATCCCAAGCTTGAATCTGAATTTGTTTACGGAGACTATAAAGTGTACGATGTTAG  
GAAAATGATCGCAAAGTCTGAGCAGGAAATAGGCAAGGCCACCGCTAAGTACTTCTTTTACAGCAATATTTAATTTTTTCA  
AGACCGAGATTACACTGGCCAATGGAGAGATTCCGAAGCGACCACTTATCGAAAACAAACGGAGAAAACAGGAGAAAATCGTGTGG  
GACAAGGGTAGGGATTTTCGACAGTCCGGAAGTCTGTCCATGCCGAGGTGAACATCGTAAAAAGACCGAAGTACAGAC  
CGGAGGCTTCTCCAAGGAAAGTATCTCCGAAAAGGAACAGCGACAAGCTGATCGCACGAAAAAAGATTGGGACCCCAAGA  
AATACGGCGGATTGATTTCTCTACAGTCGCTTACAGTGTACTGGTTGTGGCCAAAGTGGAGAAAAGGGAAGTCAAAAACTC  
AAAAGCGTCAAGGAACGCTGGGCATCACAATCATGGAGCGATCAAGCTTCGAAAAAACCCTATCGACTTTCTCGAGGCGAA  
AGGATATAAAGAGGTCAAAAAAGACCTCATATTAAGCTTCCAAGTACTCTCTCTTTGAGCTTGA AAAACGGCCGAAACGAA  
TGCTCGTAGTGGCGGAGCTGCAGAAAAGTAACGAGCTGGCACTGCCCTCTAAATACGTTAATTTCTTGTATCTGGCCAGC  
CACTATGAAAAGCTCAAAGGTCTCCCGAAGATAATGAGCAGAAGCAGCTGTTCTGTGGAACAACACAACACTACCTTGATGA  
GATCATCGAGCAAATAAGCGAATTTCTCCAAAAGAGTGATCTCGCCGACGTAACCTCGATAAGGTGCTTTCTGCTTACAATA  
AGCACAGGGATAAGCCCATCAGGGAGCAGGCAGAAAACATTATCCACTTGTTTACTCTGACCAACTTGGGCGCGCTGCAGCC  
TTCAAGTACTTCGACACCACCATAGACAGAAAAGCGGTACACCTCTACAAAGGAGGTCTGGACGCCACACTGATTCATCAGTC  
AATTACGGGCTCTATGAAAACAAGAATCGACCTCTCTCAGCTCGGTGGAGACAAGCGTCTCTGCTACTAAGAAAGCTGGTC  
AAGCTAAGAAAAGAAATAA TctagcacctaggaggatccactcgAGGTTTAGAGAGGGCGAATCCAGCTCTGGAGCAGAGGC  
TCTGGCAGCTTTTGCAGCGTTTATATAACATGAAATATATATACGCATTCCGATCAAAGCTGGGTTAACAGATAGATAGATA  
GTAACGTTTAAATAGCGCTGGCGCTTCGATTTTAAAGAGATTTAGAGCGTTATCCCGTGCCTATAGATCaTATAGTATAGA  
CAACGAACGATCACTCAAATCCAAGTCAATAATTCAAGAAATTTATGTCTGTTTCTGTGAAAGGGAACTAATTTGTTAAAGA  
AGACTTACAATATCGTAATACTTGTCAATCGTCGTGGCCGATAGAAAATCTTACAATCCGAAAGTTGATGAATGGAATTGG  
TCTGCAACTGGTCGCCTTCATTTTCGTA AAAATGTTTCGCTGCGGCCGAAAAATTTTCGATATATCTACAATTCATCTACAATCTT  
TACTAAATTTTGA AAAAGGAACACTTTGAATTTCAACTGTCAATCGTATCATTAGAATTTAATCTAAATTTAAATCTTGCTA  
AAGGAAATAGCAAGGAACACTTTTCGTCGTGCGCTACGCATTTCATTGTA AAAATTTTAAATTTTGCATTTCCGCACTTTTGTATA  
GATAAGCGAAGAGTATTTTATTACATGTATCGCAAGTATTCATTTCAACACACATATCTATATATATATATATATATATATA  
TATATATATATATATATATATATATATATATATATATATATATATATATATATATATATATATATATATATATATATATA  
ATTATATAATTTTTTTTATTTTTTAAAAAATGTGTACACATATCTGAAAATGAAAAATTC AATGGCTCGAcTGCCAAATAAA  
GAAATGGTTACAATTTAAGGAAACAAATGTCCTTCTTGCACTAGTGAGCTCCAGCTTTTGTCCCTTTAGTGAGGGTTAATTT  
CGAGCTTGGCGTAATCATGGTCATAGCTGTTTCTGTGTGAAATTTGTTATCCGCTCACAATCCACACAACATACGAGCCGGA  
AGCATAAAGTGTAAGCCTGGGGTGCCTAATGAGTGAGCTAACTCACATTAATGCGTTGCGCTCACTGCCGCTTTCCAGTC  
GGGAAACCTGTCGTGCCAGCTGCATTAATGAATCGGCCAACGCGGGGAGAGGCGGTTTGGCTATTGGGCGCTCTTCCGCTT  
CCTCGCTCACTGACTCGCTGCGCTCGGTCGTTCCGCTGCGCGGAGCGGTATCAGCTCACTCAAAGGCGGTAATACGGTTATCC  
ACAGAATCAGGGGATAACGCAGGAAAGACATGTGAGCAAAGGCCAGCAAAGGCCAGGAACCGTAAAAAGGCCGCTTGCT  
GGCGTTTTTCCATAGGCTCCGCCCCCTGACGAGCATCAAAAATCGACGCTCAAGTCAGAGGTGGCGAAAACCCGACAGGAC  
TATAAAGATAACCAGGCTTTCCCCCTGGAAGCTCCCTCGTGCGCTCTCCTGTTCCGACCTGCCGCTTACCGGATACCTGTCC  
GCCTTTCTCCCTTCGGGAAGCGTGGCGCTTCTCATAGCTCACGCTGTAGGTATCTCAGTTCCGTTGAGTTCGTTCCGCTCCAA  
GCTGGGCTGTGTGCACGAACCCCCGTTACGCCGACCGCTGCGCTTATCCGGTAACATATCGTCTTGGTCCAAACCCGGTAA  
GACACGACTTATCGCCACTGGCAGCAGCCACTGGTAACAGGATTAGCAGAGCGAGGTATGTAGGCGGTGTACAGAGTCTTTG  
AAGTGGTGGCCTAACTACGGCTACACTAGAAGGACAGTATTTGGTATCTGCGCTCTGCTGAAGCCAGTTACCTTCGAAAAAG  
AGTTGGTAGCTCTTGATCCGGCAAACAACACCCGCTGGTAGCGGTGGTTTTTTTTGTTTGAAGCAGCAGATTACGCGCAGAA  
AAAAAGGATCTCAAGAAGATCCTTTGATCTTTTCTACGGGCTGACGCTCAGTGAACGAAAACCTCACGTTAAGGGATTTT

GTCATGAGATTATCAAAAAGGATCTTCACCTAGATCCTTTTAAATTA AAAATGAAGTTTTAAATCAATCTAAAAGTATATATGA  
 GTAAACTTGGTCTGACAGTTACCAATGCTTAATCAGTGAGGCACCTATCTCAGCGATCTGTCTATTTTCGTTTCATCCATAGTTG  
 CCTGACTCCCCGTCGTGTAGATAACTACGATACGGGAGGGCTTACCATCTGGCCCCAGTGCTGCAATGATACCGCGAGACCCA  
 CGCTCACCGGCTCCAGATTTATCAGCAATAAACCAGCCAGCCGGAAGGGCCGAGCGCAGAAGTGGTCTTCAACTTTATCCGC  
 CTCCATCCAGTCTATTAATTGTTGCCGGGAAGCTAGAGTAAGTAGTTCGCCAGTTAATAGTTTGCGCAACGTTGTTGCCATTG  
 CTACAGGCATCGTGGTGTACGCTCGTCTGTTGGTATGGCTTCATTCAGCTCCGGTTCCTCAACGATCAAGGCGAGTTACATGA  
 TCCCCCATGTTGTGCAAAAAAGCGGTTAGCTCCTTCGGTCTCCGATCGTTGTGAGAAGTAAGTTGGCCGAGTGTATCACT  
 CATGGTTATGGCAGCACTGCATAATCTCTTACTGTATGCCATCCGTAAGATGCTTTTTCTGTGACTGGTGGTACTCAACCA  
 AGTCATTCTGAGAATAGTGTATGCGGCGACCGAGTTGCTCTTGGCCGCGTCAATACGGGATAATACCGCGCCACATAGCAGA  
 ACTTTAAAAGTGCTCATCATTGGAAAACGTTCTTCGGGGCGAAAACCTCAAGGATCTTACCCTGTTGAGATCCAGTTCGAT  
 GTAACCCACTCGTGCACCCAACCTGATCTTCAGCATCTTTTACTTTTACCAGCGTTTCTGGGTGAGCAAAAAACAGGAAGGCAA  
 ATGCCGCAAAAAAGGGAATAAGGGCGACACGAAATGTTGAATACTCATACTCTTCCCTTTTCAATATTATTGAAGCATTTAT  
 CAGGGTTATTGTCTCATGAGCGGATACATATTTGAATGTATTTAGAAAAATAAACAAATAGGGGTTCCGCGCACATTTCCCCG  
 AAAAGTGCCACCTAAATTGTAAGCGTTAATATTTTGTAAAAATTCGCGTTAAATTTTTGTAAATCAGCTCATTTTTTAACCA  
 ATAGGCCGAAATCGGCAAAATCCCTTATAAATCAAAAGAAATAGACCGAGATAGGGTTGAGTGTGTTCCAGTTTGAACAAGA  
 GTCCACTATTAAAGAACGTGGACTCCAACGTCAAAGGGCGAAAACCGTCTATCAGGGCGATGGCCCACTACGTGAACCATCA  
 CCCTAATCAAGTTTTTTGGGGTTCGAGGTGCCGTAAAGCACTAAATCGGAACCCTAAAGGGAGCCCCGATTTAGAGCTTGACG  
 GGGAAAGCCGGCGAACGTGGCGAGAAAGGAAGGAAAGAAAGCGAAAGGAGCGGGCGCTAGGGCGCTGGCAAGTGTAGCGGTCA  
 CGCTGCGCGTAACCACCACACCCGCCGCGCTTAATGCGCCGCTACAGGGCGCGTCCCATTGCGCCATTAGGCTGCGCAACTGT  
 TGGGAAGGGCGATCGGTGCGGGCCTCTTCGCTATTACGCCAGCTGGCGAAAGGGGGATGT

**Figure S2. Full-length sequence of the *nos-Cas9*<sup>D10A</sup> (or *nos-Cas9*<sup>H840A</sup>) plasmid.** The key components of the plasmid are color-coded. The *vermilion* reporter, magenta; *attB* site, brown; the *nos* promoter, 5'UTR, and 3'UTR, cyan; *Cas9* gene, green; the D10A mutation, red (or the H840A mutation, purple).

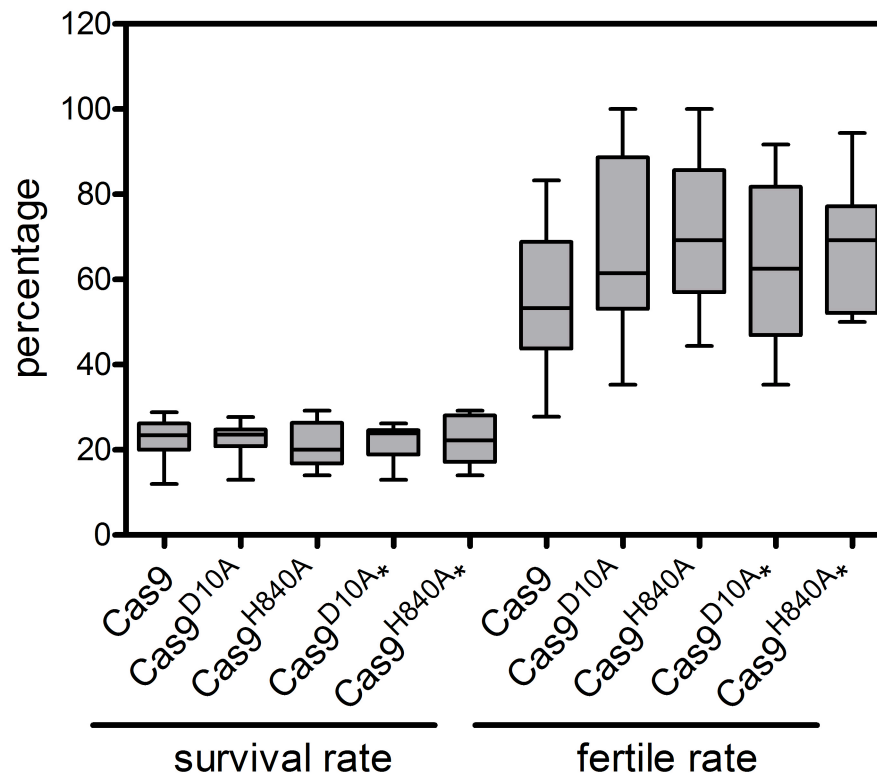

**Figure S3. No significant improvement of survival and fertile G0 rates when applying Cas9 nickase.** Using data from Table S3, the average survival and fertile G0 rates are calculated for Cas9 with one sgRNA (Cas9), or for Cas9 nickase with offset sgRNA pairs (Cas9<sup>D10A</sup> and Cas9<sup>H840A</sup>). In addition, survival and fertile G0 rates for Cas9 nickase with paired sgRNAs that successfully generated heritable mutants are also calculated (Cas9<sup>D10A\*</sup> and Cas9<sup>H840A\*</sup>). No significant differences are observed among five groups, for either survival rate or fertile rate.

**NGG**:PAM    **N**:mismatch  
 CAATATGGACATCTTTGGGG**CGG** white-sgRNA-A  
**TATTAAGGACATCTTTGGGT**CGG**** potential off-target site A1  
  
 CAGGAGCTATTAATTCGCGG**AGG** white-sgRNA-B  
 CAGGAGCTATTAAT**GTC**CG**CCGG** potential off-target site B1  
  
 GCACAATATGGACATCTTTG**GGG** white-sgRNA-C  
**CTGAAC**ATGGACATCTTTG**CAG** potential off-target site C1  
  
 AGGTGAGGTTCTCGGCTAGT**TGG** white-sgRNA-D  
**AACTGATGAT**CTCGGCTAGT**TGG** potential off-target site D1  
**GGA**TGAGGTTCTCGGCT**GGCTGG** potential off-target site D2

**Figure S4. No off-target effect detected using the transgenic Cas9 nickase flies to generate heritable mutations.** F1 flies from three groups of successful *white* mutations using Cas9<sup>D10A</sup> flies and pairs of sgRNAs are tested. Four sgRNA on-target sequences and their corresponding potential off-target sites are listed. Genomic regions that have no more than four mismatches to the on-target and a neighboring PAM are sequenced from eight F1 white-eyed flies for each group. No mutations were detected at the potential off-targets. Mismatches between the potential off-targets and the targeted region are shown in red. The PAM sequences are in bold type.

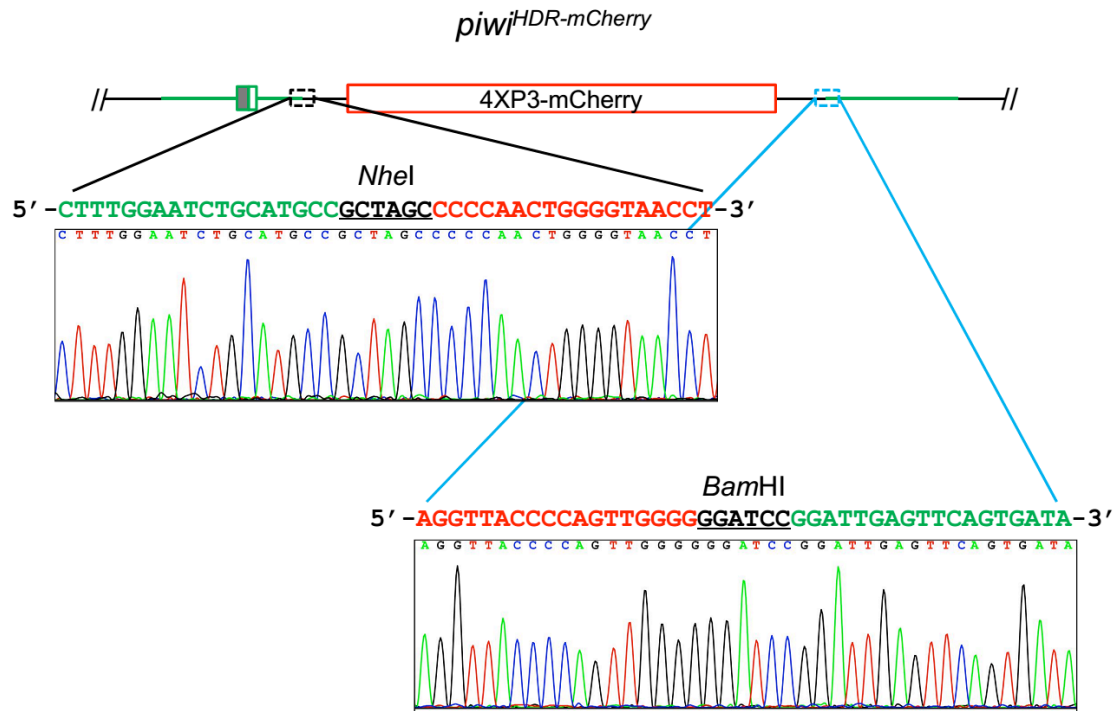

**Figure S5. Representative sequencing results at the break points of the *piwi*<sup>HDR-mCherry</sup> mutant lines.** The two boxes show parts of the sequencing results that represent the break points on the genomic DNA, with the genomic sequence in green and the 4XP3-mCherry sequence in red. Sequencing results with all six *piwi*<sup>HDR-mCherry</sup> lines show the same result.



**NGG**: PAM    **N**: mismatch

**piwi-HDR-sgRNA-left**

CGGACATGACCAAATGGAC**CCGG**

CGGACATGACCAAAT**TGACTCGG** potential off-target site L1

CGGACATGACCAGAT**CGACCGG** potential off-target site L2

CGGACATGACCAAAT**CGAGTCGG** potential off-target site L3

CGGACATGACCAGAT**CGACTAGG** potential off-target site L4

CGGACATGACCAGAT**CGACTCAG** potential off-target site L5

**piwi-HDR-sgRNA-right**

TATCGATTGCAAGTTGGGG**TAGG**

TATCGATTGCAA**ATTGTGCTGG** potential off-target site R1

TATCG**TTT**GCAAGTTG**CTATCAG** potential off-target site R2

**Figure S6. No off-target effect detected using the CRISPR system to generate *piwi* mutations.** Flies from six successful *piwi*<sup>HDR-mCherry</sup> mutation strains are tested. The two sgRNA on-target sequences and their corresponding potential off-target sites are listed. Genomic regions that have no more than four mismatches to the on-target and a neighboring PAM are sequenced. No mutations were detected at the potential off-targets. Mismatches between the potential off-targets and the targeted region are shown in red. The PAM sequences are in bold type.

**Table S1. Sequences of the oligonucleotides for mutation detection and vector construction in this study.**

| Use                                                            | Name             | Sequence                          |
|----------------------------------------------------------------|------------------|-----------------------------------|
| Indel mutation<br>detection                                    | White-F          | TATCATTGCAGGGTGACAGCG             |
|                                                                | White-R          | GGCATTGAGCAGGGTCGTC               |
| Cas9 nickase<br>mutagenesis                                    | Cas9-D10A-F      | CTCCATTGGGCTCGCTATCGGCACAAACA     |
|                                                                | Cas9-D10A-R      | TGTTTGTGCCGATAGCGAGCCCAATGGAG     |
|                                                                | Cas9-H840A-F     | TACGACGTGGATGCTATCGTGCCCCAG       |
|                                                                | Cas9-H840A-R     | CTGGGGCACGATAGCATCCACGTCGTA       |
| <i>piwi</i> -4XP3-mCherry<br>donor template<br>homologous arms | <i>piwi</i> -L-F | GGCCTAGGTGCGGTATTTAAGGCTCTTGC     |
|                                                                | <i>piwi</i> -L-R | CTAGCTAGCGGCATGCAGATTCCAAGAC      |
|                                                                | <i>piwi</i> -R-F | CGGGATCCGGATTGAGTTCAGTGATAATATCG  |
|                                                                | <i>piwi</i> -R-R | GGACTAGTCGCAACTGAGCAATACTTTCCAC   |
| <i>piwi</i> -4XP3-mCherry<br>donor template<br>mCherry marker  | mCherry-F        | CCGCTCGAGATGGTGAGCAAGGGCGAGGA     |
|                                                                | mCherry-R        | CGGGGTACCTTACTTGTACAGCTCGTCCATGCC |
|                                                                | SV40-F           | CGGGGTACCGATCTTTGTGAAGGAACC       |
|                                                                | SV40-R           | CGGGATATCACTAGACTGGAACCAGACATG    |
| <i>piwi</i> <sup>HDR-mCherry</sup><br>confirmation             | primer 1         | TTACTTGCATAGCAGGGTGGCTG           |
|                                                                | primer 2         | CTCCGGCGCTCGTCTAGTGTCG            |
|                                                                | primer 3         | CACACCTCCCCCTGAACCTG              |
|                                                                | primer 4         | GCCTCCACCAGTTCAGACG               |

**Table S2. Sequences of the oligonucleotides for off-target effect analysis.**

| primers        | Sequence (5' to 3')    |
|----------------|------------------------|
| white-OTE-A1-F | CGACACCAGCTATGGTTTCGG  |
| white-OTE-A1-R | CTCGGTATGGACCTAGAGGC   |
| white-OTE-B1-F | AACAAACAACCGCTCAACCC   |
| white-OTE-B1-R | GAATCGGGCGTAGAAGACAG   |
| white-OTE-C1-F | TGTTTCGTCGCTCCTTCCTCC  |
| white-OTE-C1-R | AGGAGCACAAGGCGAAGCAC   |
| white-OTE-D1-F | ACCAAGGGTGGATAGGTGCG   |
| white-OTE-D1-R | GGGTTGAACTTCCTACTTGCC  |
| white-OTE-D2-F | GATCTTTGGCTTCGTTTCAGG  |
| white-OTE-D2-R | TTGAACCGCCCACTGCTCC    |
| piwi-OTE-L1-F  | GAACCTGAATGCCTAATCTC   |
| piwi-OTE-L1-R  | CGATTTGACTTTGGGCAAGA   |
| piwi-OTE-L2-F  | CAACTGACCTCTTAGCCCTCG  |
| piwi-OTE-L2-R  | TAGAGCGAGATTTCCCTTGAGC |
| piwi-OTE-L3-F  | ACTGGGACCTACGATTGCC    |
| piwi-OTE-L3-R  | AAGCGAGACCGCACTACCG    |
| piwi-OTE-L4-F  | GGAGGGTAAAGGGCACGAAA   |
| piwi-OTE-L4-F  | CAATGAGTTTGCCCTTGACG   |
| piwi-OTE-L5-F  | CGATAGAAATGGGCAAAGCAAC |
| piwi-OTE-L5-R  | GTGGAGGTGGTATTTATTGCC  |
| piwi-OTE-R1-F  | GTCATTAAGTCTGGCCTGTGGG |
| piwi-OTE-R1-R  | AGGGCTCAATGTTGAACGAAGC |
| piwi-OTE-R2-F  | CATCGCATCCATGATTCCTC   |
| piwi-OTE-R2-R  | AGGCGCAAAGTATTCACCC    |

**Table S3. Sequences of the oligonucleotides for off-target effect analysis.**

|                       | sgRNA name        | embryos | total G0 | fertile G0 | survival rate* | fertile rate** |
|-----------------------|-------------------|---------|----------|------------|----------------|----------------|
| Cas9                  | white-A           | 53      | 12       | 8          | 22.6%          | 66.7%          |
|                       | white-B           | 61      | 16       | 13         | 26.2%          | 81.3%          |
|                       | white-C           | 60      | 15       | 8          | 25.0%          | 53.3%          |
|                       | white-D           | 50      | 10       | 5          | 20.0%          | 50.0%          |
|                       | white-E           | 51      | 10       | 8          | 19.6%          | 80.0%          |
|                       | white-F           | 65      | 16       | 7          | 24.6%          | 43.8%          |
|                       | white-G           | 65      | 16       | 11         | 24.6%          | 68.8%          |
|                       | white-H           | 65      | 14       | 9          | 21.5%          | 64.3%          |
|                       | white-I           | 50      | 6        | 5          | 12.0%          | 83.3%          |
|                       | white-J           | 50      | 10       | 5          | 20.0%          | 50.0%          |
|                       | white-K           | 66      | 19       | 6          | 28.8%          | 31.6%          |
|                       | white-L           | 64      | 15       | 8          | 23.4%          | 53.3%          |
|                       | white-M           | 65      | 15       | 5          | 23.1%          | 33.3%          |
|                       | white-N           | 66      | 18       | 12         | 27.3%          | 66.7%          |
|                       | white-O           | 60      | 16       | 5          | 26.7%          | 31.3%          |
|                       | white-P           | 65      | 18       | 5          | 27.7%          | 27.8%          |
|                       | white-Q           | 60      | 12       | 9          | 20.0%          | 75.0%          |
| white-R               | 55                | 8       | 4        | 14.5%      | 50.0%          |                |
| white-S               | 65                | 16      | 10       | 24.6%      | 62.5%          |                |
| Cas9 <sup>D10A</sup>  | white-J + white-F | 55      | 11       | 7          | 20.0%          | 63.6%          |
|                       | white-E + white-K | 56      | 13       | 8          | 23.2%          | 61.5%          |
|                       | white-E + white-L | 60      | 15       | 9          | 25.0%          | 60.0%          |
|                       | white-E + white-F | 65      | 17       | 10         | 26.2%          | 58.8%          |
|                       | white-D + white-R | 54      | 7        | 6          | 13.0%          | 85.7%          |
|                       | white-D + white-H | 65      | 18       | 8          | 27.7%          | 44.4%          |
|                       | white-Q + white-B | 56      | 10       | 7          | 17.9%          | 70.0%          |
|                       | white-E + white-R | 68      | 16       | 11         | 23.5%          | 68.8%          |
|                       | white-D + white-I | 66      | 16       | 9          | 24.2%          | 56.3%          |
|                       | white-D + white-C | 55      | 12       | 11         | 21.8%          | 91.7%          |
|                       | white-E + white-H | 65      | 16       | 7          | 24.6%          | 43.8%          |
|                       | white-E + white-I | 65      | 16       | 9          | 24.6%          | 56.3%          |
|                       | white-E + white-A | 65      | 17       | 6          | 26.2%          | 35.3%          |
|                       | white-F + white-A | 65      | 16       | 8          | 24.6%          | 50.0%          |
|                       | white-E + white-G | 50      | 9        | 9          | 18.0%          | 100.0%         |
|                       | white-E + white-A | 55      | 13       | 13         | 23.6%          | 100.0%         |
| white-E + white-O     | 60                | 13      | 12       | 21.7%      | 92.3%          |                |
| Cas9 <sup>H840A</sup> | white-K + white-S | 65      | 17       | 9          | 26.2%          | 52.9%          |
|                       | white-F + white-L | 65      | 19       | 13         | 29.2%          | 68.4%          |
|                       | white-K + white-P | 55      | 10       | 7          | 18.2%          | 70.0%          |
|                       | white-F + white-M | 55      | 10       | 5          | 18.2%          | 50.0%          |
|                       | white-S + white-N | 65      | 18       | 17         | 27.7%          | 94.4%          |
|                       | white-E + white-F | 50      | 7        | 5          | 14.0%          | 71.4%          |
|                       | white-D + white-R | 68      | 18       | 11         | 26.5%          | 61.1%          |
|                       | white-D + white-H | 50      | 9        | 4          | 18.0%          | 44.4%          |
|                       | white-Q + white-B | 45      | 7        | 6          | 15.6%          | 85.7%          |
|                       | white-E + white-R | 45      | 7        | 6          | 15.6%          | 85.7%          |
|                       | white-D + white-C | 55      | 13       | 9          | 23.6%          | 69.2%          |
|                       | white-E + white-H | 50      | 10       | 10         | 20.0%          | 100.0%         |
|                       | white-E + white-I | 65      | 16       | 11         | 24.6%          | 68.8%          |

\*The survival rate is calculated as the percentage of total G0 adults divided by embryos injected.

\*\*The fertile rate is calculated as the percentage of fertile G0 flies divided by total G0 adults.
