# Supplementary material for: Performance of the Cas9 Nickase System in Drosophila melanogaster
Source: PubMed Central journal article supplement (PMC4199701; doi:10.1534/g3.114.013821), 2014-08-15
Supplement: supp_g3.114.013821_FigureS2.pdf [file supp_g3.114.013821_FigureS2.pdf]

GCTGCAAGGCGATTAAGTTGGGTAACGCCAGGGTTTTCCAGTCACGACGTTGTAACACGACGGCCAGTGAATTGTAATACGA  
CTCCTATAGGGCGAATTGGGTACAAGCTTATTTATTTTGTATGTTATATGTATTATATGTGACACATAAAGAAAAGGAACA  
CATCAAATGTGATAACAAAGACTAAACAAGTAATTTTTATTACACAAAACGACAAAACAGTAGGCAGAACAAAACGCATAG  
CCAAACATTGACGAATTGGATACCCCTGCCGATTGTGACACACTTTTGTGTGATCAGTTTCTTGCGAATGGTCTCGTCCAGCGGT  
GGAATCGCCTCGCGGGGAATCAGAAAAGTGGACAGATTGAACAGATCCAGAAAACCTTGTACCGATCACTGAAACCAAAAA  
AAACAAAGGGAACAGTTTGGATTTCATTGATCCCCGATATAATCACATCTGCGATGATCACCTGAGAGTGGAGCGCAGATAT  
TGATAACCAGACGAGCCACCAGTGCCCAACTGTTGCGATCCAATCATGCGTTGCACCATGATCACGTGATTGTCTGCGGCGGG  
AATAGAAAAGTATTTGGTTAGGAAAACCAGTCTTAAACATAAGATATATTTATAAAAAGAGTATCAAAGAATGCAATACTTACAT  
CTCCACTTGGTTATTAACGAGTCGATGTCCATGAGCAGGGTGAGCAACTGGTGTGGTTGGCTGAACTGGGTTTCATCCCTATA  
GAAGGTGATCATGATGGTCCCTGAAGGGCAGATGGCTAAACCGGCGATCCCCACGACGCCAGTGCATCGTGCCTGCGGCGGG  
GATCAAAGATGGAGCGATACACCTCGCGTCTTCAATGTCCATGAGGCGGTAGTTTTTCGCTTCTCCACGGGCTCCTCC  
ATGGCGCTCTGTACCTGCGCCTCCAGGAATCGATCGACGCTCTCTGAACTTGGCCAGAAAGTTGAAGCCACTCTCCTCCAG  
TCCGGGCGTCTCTCCAGCCATCGCTGCACTAGCTCCAGTAGCGAGGGATCTTCTCCGAGTTGCGAATCGAGTCCGCGCCT  
CCTCGTCTGATAAAGACATCCGAGTACTTCTGGTTGTATCTCACCCGCTGCTCTGTGCAACTCCAGCTTGTCTCGATCAA  
CGGAATGCAGCGACTGAAAACCAGATGCGGGTGCAGGTAAGTTCGCGAAGTCCATGAAGTCTAGCGGGGTCATGGTCTCCAG  
AATGGGCACTTGGTCCACCAGGAGCTGTACAAAGGAAGTTATAAACGGATTTGGTAAGAGATTAGAAAGCACTCACTTTTA  
GAATCAGAACCACTCGGTTTCAGTCGTTGACAATCTCCAGCGTCTGGTTTCATCGATGACCTCTGCATCCAACATGTCTCGT  
ATGGAGTCAACTCAAAGATGATCTGCTTGAACCAAGCTCGTAGGCTGTGGCGAAGTACTTAAATGCCATTGAGTGTGTC  
ATCAAAGTTGTAACCTACTCACCTGGTGCCTGATGATGAACAGATGCTCATCGTGCACGGGTCGCTTGTCTCCTCGGACA  
GCATACACTGGGCATCCAGCAGTTTGTCCAGCATCAGATACTCTCCATAGATTTTGGCCACTTCCGTGGTTAATGGCACC GCC  
GAATCATCGTATCGTTTCTGTATGGGTTGAATTGAATCGCAGAACTGAAGATCGATTGGCATTCTGGACAGCACGTGCTG  
GTGCTCACCCGTTTCTGCATAGGGACAGCTCATGGTGCACAGCTCAGATCAGATCGTACTCCTCGACCGGCGGATGCTGGC  
GAACTGATCTCCGCCAGCGACCGGAGATGAGACCCACGGAACCGATAACAGAGCGAGAGACTCCAGTTCGACTGATTGC  
ACAGTCGGTGTCTGGGCGATGGGCACTGCCAGATAGGCTGGGAATTATCAATCACTTGACGTGAAAGTGGGCGCACACAAA  
TCCAAGCTTGATATCATCGATCTCGACGCTGCATCCAACGCGTTGGGAGCTCTCCGGATCAATTCGGCTTCCAGTACCGTCA  
CGATGTAGGTACGGTCTCGAAGCCGCGGTGCGGGTGCCAGGGCGTGCCTTGGGCTCCCGGGGCGTACTCCACCTCACCC  
ATCTGGTCCATCATGATGAACGGGTGAGGTGGCGGTAGTTGATCCCGGCAACGCGCGGCGCACCGGGAAGCCCTCGCCCTC  
GAAACCGCTGGGCGCGGTGGTACGGTGAGCACGGGACGTGCGACGGCGTGGCTGGTGGGATAACGGGGGACGCTCAGCG  
GGTCTCGACGGTACGGCGGGCATGTCGACAAGCCGAATTGATCCACTAGAAGGCCATAATTCGtCTAGCAGGATCTctaggG  
CTTCGACCGTTTTAACCTCGAAATATGCACATGTAAGGACGGATGTGAGCGAACGCCAGTGTGACCGGGATCAGAGGTAACC  
TACCATGGTGGGATTAGGTGACCGTTTCGAGGTAGTTTGTGAGCGGAATGTTCCGGGGGCTGGCGTCAGAGGCTCTAAA  
CTTTATGTAATTCCTGCCGGAACACGCACGATCAAGCAGTCAGCTGTTCTCTTCGTTTTCAGCGCGCGCCGGTGTGCAAAA  
CGAGCGCTCTTCGCCGCGGTGGCTCGTGCATAGTTCGTTTTGTGCGTAATCCGATGTTGCCGCGCCGATATCATGTGATGT  
TGTCACAGTGGCGAAATTCGAATGGTGGTGTGACGTGATGTGTTGTGACGGCGAGTGGCGCGTGTGGGTGCTTAGTTTTGG  
GAGATGTTTTCGTATTTTTTTGTTGATAACTCAGGCTTTGTTGCTGTGTTGTAGTACTATTTTCCATTGCGCGGTGTCAGCT  
TTTAATTAGTGGCACATATCTTAGCAAGTAAAAATTAATTTGCATACTATTAATTTCTTATAAATTAATTTCTAAAATTA  
GTTTACCTTTTCAATTTTACTAAAAATATCGATATATTTATATCGCTGGAACACTACATTATTCACCTTAAGCAAGAACC  
GTTAGTTGGCGGTAGCTTTACCACAAAATTCCTGGAATTCGCTAGCCTTCGAGTGTTCGTAAGTTGTCTAAGGGACATAC  
GATTTTTTTTGCCTCTGCGTCACGATTTTAAACCAAAAGCGAGTTTAGTTACATGTACATTATTAATAGATAAAGAAGTATCG  
CGAATACTTCAGTTGAATAAACTGTGCTTGGTTTTTGGGTGAGGATTTGTGAAAGTAGAGTGGCGGATAACCGTAACCTTTCG  
ACCCGGATTTTCGCTgAATTgagatetcTCTAGAggtacCGCCACCATGGCCCCAAGAAGAAGCGGAAGGTGGTATCCAC  
GGTGTCCAGCAGCCATGGACAAGAAGTACTCCATTGGGCTC**GT**ATCGGCACAAACAGCGTGGCTGGGCGCTCATTACGGA  
CGAGTACAAGGTGCCGAGCAAAAATTCAAAGTTCTGGCAATACCGATCGCCACAGCATAAAGAAGAACCCTATTGGCGCCC  
TCCTGTTTCGACTCCGGGAGACGGCCGAAGCCACGCGGCTCAAAGAACAGCACGGCGCAGATATACCCGAGAAAGAATCGG  
ATCTGTACTCGCAGGAGATCTTTAGTAATGAGATGGCTAAGGTGGATGACTCTTTCTTCCATAGGCTGGAGGAGTCTTTTT  
GGTGGAGGAGATAAAAAGCACGAGCGCCACCCAATCTTTGGCAATATCGTGGACGAGGTGGCGTACCATGAAAAGTACCCAA  
CCATATATCATCTGAGGAAGAAGCTTGTAGACAGTACTGATAAGGCTGACTTGCAGTGTATCTATCTCGCGCTGGCGCATATG  
ATCAAATTTCCGGGACACTTCTCATCGAGGGGACCTGAACCCAGACAACAGCGATGTCGACAAACTCTTTATCCAACCTGGT  
TCAGACTTACAATCAGCTTTTTCGAAGAGAACCCGATCAACGCATCCGGAGTTGACGCCAAAGCAATCTTGAGCGCTAGGCTGT  
CCAAATCCCGGCGGCTCGAAAACCTCATCGCACAGCTCCCTGGGAGAGAAGAAGACGGCTGTTTGGTAATCTTATCGCCCTG  
TCACTCGGGCTGACCCCAACTTTAAATCTAACTTCGACTTGGCCGAAGATGCCAAGCTTCAACTGAGCAAAGACACCTACGA  
TGATGATCTCGACAATCTGCTGGCCAGATCGGCGACCAGTACGCAGACCTTTTTTTGGCGGCAAGAACCCTGTCAGACGCCA  
TTCTGCTGAGTATATCTGCGAGTGAACACGGAGATACCAAAGCTCCGCTGAGCGCTAGTATGATCAAGCGCTATGATGAG  
CACCACCAAGACTTGACTTTGCTGAAGGCCCTTGTGACAGCAACTGCCTGAGAAGTACAAGGAAATTTTCTTCGATCAGTC  
TAAAAATGGCTACGCCGATAACATTGACGGCGGAGCAAGCCAGGAGGAATTTTACAAATTTATTAAGCCCATCTTGAAAAA  
TGGACGGCACCGAGGAGTCTGTTGTAAGCTTAACAGAGAAGATCTGTTGCGCAAACAGCGCACTTTTCGACAAATGGAAGCATC  
CCCCACCAGATTCACCTGGGCGAAGTGCAGCTATcCTCAGCGGCAAGAGGATTTCTACCCCTTTTTGAAAGATAACAGGGA  
AAAGATTGAGAAAATCTCACATTTCCGATACCTACTATGTAGGCCCCCTCGCCCGGGAAATTCAGATTCCGCTGGATGA

CTCGCAAATCAGAAGAGACCATCACTCCCTGGAACCTCGAGGAAGTCGTGGATAAGGGGGCCTCTGCCAGTCCTTCATCGAA  
AGGATGACTAACTTTGATAAAAAATCTGCCTAACGAAAAGGTGCTTCCTAAACACTCTCTGCTGTACGAGTACTTCACAGTTTA  
TAACGAGCTACCAAGGTCAAATACGTCACAGAAGGGATGAGAAAGCCAGCATTCTGTCTGGAGAGCAGAAGAAAGCTATCG  
TGGACCTCTCTTCAAGACGAACCGGAAAAGTTACCGTGAACAGCTCAAAGAAGACTATTTCAAAAAGATTGAATGTTTCGAC  
TCTGTTGAAATCAGCGGAGTGGAGGATCGCTTCAACGCATCCCTGGGAACGTATCACGATCTCTGAAAATCATTAAAGACAA  
GGACTTCTGGACAATGAGGAGAACGAGGACATTCTTGGAGCATTGTCTCACCCCTTACGTTGTTTGAAGATAGGGAGATGA  
TTGAAGAACGCTTGA AAACTTACGCTCATCTCTTCGACGACAAAAGTCATGAAAACAGCTCAAGAGGCGCCGATATACAGGATGG  
GGCGGCTGTCAAGAAAATGATCAATGGGATCCGAGACAAGCAGAGTGGAAAAGACAATCCTGGATTTTCTTAAAGTCCGATGG  
ATTTGCCAACCGGAACCTCATGCAGTTGATCCATGATGACTCTCTCACCTTTAAGGAGGACATCCAGAAAAGCACAAGTTTCTG  
GCCAGGGGACAGTCTTACGAGCACATCGCTAATCTTGCAGGTAGCCAGCTATCAAAAAGGGAATACTGCAGACCGTTAAG  
GTCGTGGATGAACTCGTCAAAGTAATGGGAAGGCATAAGCCCAGAAATATCGTTATCGAGATGGCCCGAGAGAACCAAACCTAC  
CCAGAAGGGACAGAAGAACAGTAGGGAAAAGGATGAAGAGGATTGAAGAGGGTATAAAAAGAACTGGGGTCCCAAATCCTTAAGG  
AACACCCAGTTGAAAACACCCAGCTTCAAGATGAGAAGCTCTACCTGTACTACCTGCAGAACGGCAGGGACATGTACGTGGAT  
CAGGAACTGGACATCAATCGGCTCTCCGACTACGACGTGGATGCTATCGTGGCCAGTCTTTTCTCAAAGATGATTCTATTGA  
TAATAAAGTGTGACAAGATCCGATAAAAAATAGAGGGAAGAGTGATAACGTCCCTCAGAAGAAGTTGTCAAGAAAATGAAAA  
ATTATTGGCGGACAGTCTGTAACGCCAACTGATCACACAACGGAAGTTCGATAATCTGACTAAGGCTGAACGAGGTGGCCCTG  
TCTGAGTTGGATAAAGCGGCTTTCATCAAAGGCAGCTTGTGAGACACGCCAGATCACCAAGCACGTGGCCCAAATTCCTCGA  
TTCACGCATGAACACCAAGTACGATGAAAATGACAACTGATTTCGAGAGGTGAAAAGTTATTACTCTGAAGTCTAAGCTGGTCT  
CAGATTTAGAAAAGGACTTTTCAAGTTTATAAGGTGAGAGAGATCAACAATTACCACCATGCGCATGATGCCACTGAAATGCA  
GTGGTAGGCACTGCCTTATCAAAAAATATCCCAAGCTTGAATCTGAATTTGTTTACGGAGACTATAAAGTGTACGATGTTAG  
GAAAATGATCGCAAAGTCTGAGCAGGAAATAGGCAAGGCCACCGCTAAGTACTTCTTTTACAGCAATATTTAATTTTTTCA  
AGACCGAGATTACACTGGCCAATGGAGAGATTCCGAAGCGACCACTTATCGAAAACAAACGGAGAAAACAGGAGAAAATCGTGTGG  
GACAAGGGTAGGGATTTTCGACAGTCCGGAAGTCTGTCCATGCCGAGGTGAACATCGTAAAAAGACCGAAGTACAGAC  
CGGAGGCTTCTCCAAGGAAAGTATCCTCCGAAAAGGAACAGCGACAAGCTGATCGCACGAAAAAAGATTGGGACCCCAAGA  
AATACGGCGGATTCGATCTCTTACAGTCGCTTACAGTGTACTGGTGTGGCCAAAGTGGAGAAAAGGGAAGTCAAAAACTC  
AAAAGCGTCAAGGAACGTCTGGGCATCACAATCATGGAGCGATCAAGCTTCGAAAAAAACCCCATCGACTTCTCGAGGCGAA  
AGGATATAAAGAGGTCAA AAAAGACCTCATATTAAGCTTCCCAAGTACTCTCTCTTTGAGCTTGA AAAACGGCCGAAACGAA  
TGCTCGTAGTGGCGGAGCTGCAGAAAAGTAACGAGCTGGCACTGCCCTCTAAATACGTAAATTTCTTGTATCTGGCCAGC  
CACTATGAAAAGCTCAAAGGTCTCCCGAAGATAATGAGCAGAAGCAGCTGTTCTGTGGAACAACACAACACTACCTTGATGA  
GATCATCGAGCAAATAAGCGAATTTCCAAAAGAGTGATCCTCGCCGACGTAACCTCGATAAGGTGCTTTCTGCTTACAATA  
AGCACAGGGATAAGCCCATCAGGGAGCAGGCAGAAAACATTATCCACTTGTTTACTCTGACCAACTTGGGCGCGCTGCAGCC  
TTCAAGTACTTCGACACCACCATAGACAGAAAGCGGTACACCTCTACAAAGGAGGTCTGGACGCCACACTGATTCATCAGTC  
AATTACGGGCTCTATGAAAACAAGAATCGACCTCTCTCAGCTCGGTGGAGACAAGCGTCTCTGCTACTAAGAAAGCTGGTC  
AAGCTAAGAAAAGAAATAA TctagcacctaggaggatccactcgAGGTTTAGAGAGGGCGAATCCAGCTCTGGAGCAGAGGC  
TCTGGCAGCTTTTGCAGCGTTTATATAACATGAAATATATATACGCATTCCGATCAAAGCTGGGTTAACAGATAGATAGATA  
GTAACGTTTAAATAGCGCTGGCGGCTTCGATTTTAAAGAGATTTAGAGCGTTATCCCGTGCCTATAGATCaTATAGTATAGA  
CAACGAACGATCACTCAAATCCAAGTCAATAATTCAAGAAATTTATGTCTGTTTCTGTGAAAGGGAACTAATTTGTTAAAGA  
AGACTTACAATATCGTAATACTTGTCAATCGTCGTGGCCGATAGAAAATCTTACAATCCGAAAGTTGATGAATGGAATTGG  
TCTGCAACTGGTCGCCTTCATTTTCGTA AAAATGTTTCGCTGCGGCCGAAAAATTTTCGATATATCTACAATTCATCTACAATCTT  
TACTAAATTTTGA AAAAGGAACACTTTGAATTTCGAACTGTCAATCGTATCATTAGAATTTAATCTAAATTTAAATCTTGCTA  
AAGGAAATAGCAAGGAACACTTTTCGTCGTCCGCTACGCATTCATTGTA AAAATTTTAAATTTTGCATTCGGCACTTTTGGATA  
GATAAGCGAAGAGTATTTTATTACATGTATCGCAAGTATTCATTTCAACACACATATCTATATATATATATATATATATATA  
TATATATATATATATATATATATATATATATATATATATATATATATATATATATATATATATATATATATATATATATA  
ATTATATAATTTTTTTTATTTTTTAAAAAATGTGTACACATATCTGAAAATGAAAAATTC AATGGCTCGAcTGCCAAAATAAA  
GAAATGGTTACAATTTAAGGAAACAAATGTCCTTCTTGCCTAGTGAGCTCCAGCTTTTGTCCCTTTAGTGAGGGTTAATTT  
CGAGCTTGGCGTAATCATGGTCATAGCTGTTTCTGTGTGAAATTTGTTATCCGCTCACAATCCACACAACATACGAGCCGGA  
AGCATAAAGTGTAAGCCTGGGGTGCCTAATGAGTGAGCTAACTCACATTAATGCGTTGCGCTCACTGCCGCTTTCCAGTC  
GGGAAACCTGTCGTGCCAGCTGCATTAATGAATCGGCCAACGCGGGGAGAGGCGGTTTGGCTATTGGGCGCTCTTCCGCTT  
CCTCGCTCACTGACTCGCTGCGCTCGGTCGTTCCGCTGCGGCGAGCGGTATCAGCTCACTCAAAGGCGGTAATACGGTTATCC  
ACAGAATCAGGGGATAACGCAGGAAAGACATGTGAGCAAAGGCCAGCAAAGGCCAGGAACCGTAAAAAGGCCGCTTGCT  
GGCGTTTTTCCATAGGCTCCGCCCCCTGACGAGCATCAAAAATCGACGCTCAAGTCAGAGGTGGCGAAAACCCGACAGGAC  
TATAAAGATAACCAGGCTTTCCCCCTGGAAGCTCCCTCGTGCCTCTCCTGTTCCGACCTGCCGCTTACCGGATACCTGTCC  
GCCTTTCTCCCTTCGGGAAGCGTGGCGCTTCTCATAGCTCACGCTGTAGGTATCTCAGTTCCGTTGAGGTCGTTCCGCTCAA  
GCTGGGCTGTGTGCACGAACCCCGTTCAGCCGACCGCTGCGCTTATCCGGTAACATATCGTCTTGGTCCAACCCGGTAA  
GACACGACTTATCGCCACTGGCAGCAGCCACTGGTAACAGGATTAGCAGAGCGAGGTATGTAGGCGGTGTACAGAGTCTTTG  
AAGTGGTGGCCTAACTACGGCTACACTAGAAGGACAGTATTTGGTATCTGCGCTCTGCTGAAGCCAGTTACCTTCGAAAAAG  
AGTTGGTAGCTCTTGATCCGGCAAACAACACCCGCTGGTAGCGGTGGTTTTTTTTGTTTGAAGCAGCAGATTACGCGCAGAA  
AAAAAGGATCTCAAGAAGATCCTTTGATCTTTTCTACGGGTCTGACGCTCAGTGAACGAAAACCTCACGTTAAGGGATTTT

GTCATGAGATTATCAAAAAGGATCTTCACCTAGATCCTTTTAAATTA AAAATGAAGTTTTAAATCAATCTAAAAGTATATATGA  
 GTAAACTTGGTCTGACAGTTACCAATGCTTAATCAGTGAGGCACCTATCTCAGCGATCTGTCTATTTTCGTTTCATCCATAGTTG  
 CCTGACTCCCCGTCGTGTAGATAACTACGATACGGGAGGGCTTACCATCTGGCCCCAGTGCTGCAATGATACCGCGAGACCCA  
 CGCTCACCGGCTCCAGATTTATCAGCAATAAACCAGCCAGCCGGAAGGGCCGAGCGCAGAAGTGGTCTTCAACTTTATCCGC  
 CTCCATCCAGTCTATTAATTGTTGCCGGGAAGCTAGAGTAAGTAGTTCGCCAGTTAATAGTTTGCGCAACGTTGTTGCCATTG  
 CTACAGGCATCGTGGTGTACGCTCGTCTGTTGGTATGGCTTCATTCAGCTCCGGTTCCCAACGATCAAGGCGAGTTACATGA  
 TCCCCCATGTTGTGCAAAAAAGCGGTTAGCTCCTTCGGTCCCTCCGATCGTTGTGAGAAGTAAGTTGGCCGCGAGTTATCACT  
 CATGGTTATGGCAGCACTGCATAATCTCTTACTGTATGCCATCCGTAAGATGCTTTTTCTGTGACTGGTGGTACTCAACCA  
 AGTCATTCTGAGAATAGTGTATGCGGCGACCGAGTTGCTCTTGGCCGCGTCAATACGGGATAATACCGCGCCACATAGCAGA  
 ACTTTAAAAGTGCTCATCATTGGAAAACGTTCTTCGGGGCGAAAACCTCAAGGATCTTACCCTGTTGAGATCCAGTTCGAT  
 GTAACCCACTCGTGCACCCAACCTGATCTTCAGCATCTTTTACTTTTACCAGCGTTTCTGGGTGAGCAAAAAACAGGAAGGCAAA  
 ATGCCGCAAAAAAGGGAATAAGGGCGACACGGAATGTTGAATACTCATACTCTTCCCTTTTCAATATTATTGAAGCATTTAT  
 CAGGGTTATTGTCTCATGAGCGGATACATATTTGAATGTATTTAGAAAAATAAACAAATAGGGGTTCCGCGCACATTTCCCCG  
 AAAAGTGCCACCTAAATTGTAAGCGTTAATATTTTGTAAAAATTCGCGTTAAATTTTTGTAAATCAGCTCATTTTTTAACCA  
 ATAGGCCGAAATCGGCAAAATCCCTTATAAATCAAAAGAAATAGACCGAGATAGGGTTGAGTGTGTTCCAGTTTGAACAAGA  
 GTCCACTATTAAAGAACGTGGACTCCAACGTCAAAGGGCGAAAAACCGTCTATCAGGGCGATGGCCCACTACGTGAACCATCA  
 CCCTAATCAAGTTTTTTTGGGGTCGAGGTGCCGTAAGCACTAAATCGGAACCCTAAAGGGAGCCCCGATTTAGAGCTTGACG  
 GGGAAAGCCGGCGAACGTGGCGAGAAAGGAAGGAAAGAAAGCGAAAGGAGCGGGCGCTAGGGCGCTGGCAAGTGTAGCGGTCA  
 CGCTGCGCGTAACCACCACACCCGCCGCGCTTAATGCGCCGCTACAGGGCGCGTCCCATTGCGCCATTAGGCTGCGCAACTGT  
 TGGGAAGGGCGATCGGTGCGGGCCTCTTCGCTATTACGCCAGCTGGCGAAAGGGGGATGT

**Figure S2. Full-length sequence of the *nos-Cas9*<sup>D10A</sup> (or *nos-Cas9*<sup>H840A</sup>) plasmid.** The key components of the plasmid are color-coded. The *vermilion* reporter, magenta; *attB* site, brown; the *nos* promoter, 5'UTR, and 3'UTR, cyan; *Cas9* gene, green; the D10A mutation, red (or the H840A mutation, purple).
