# Supplementary material for: Performance of the Cas9 Nickase System in Drosophila melanogaster
Source: PubMed Central journal article supplement (PMC4199701; doi:10.1534/g3.114.013821), 2014-08-15
Supplement: supp_g3.114.013821_FigureS3.pdf [file supp_g3.114.013821_FigureS3.pdf]

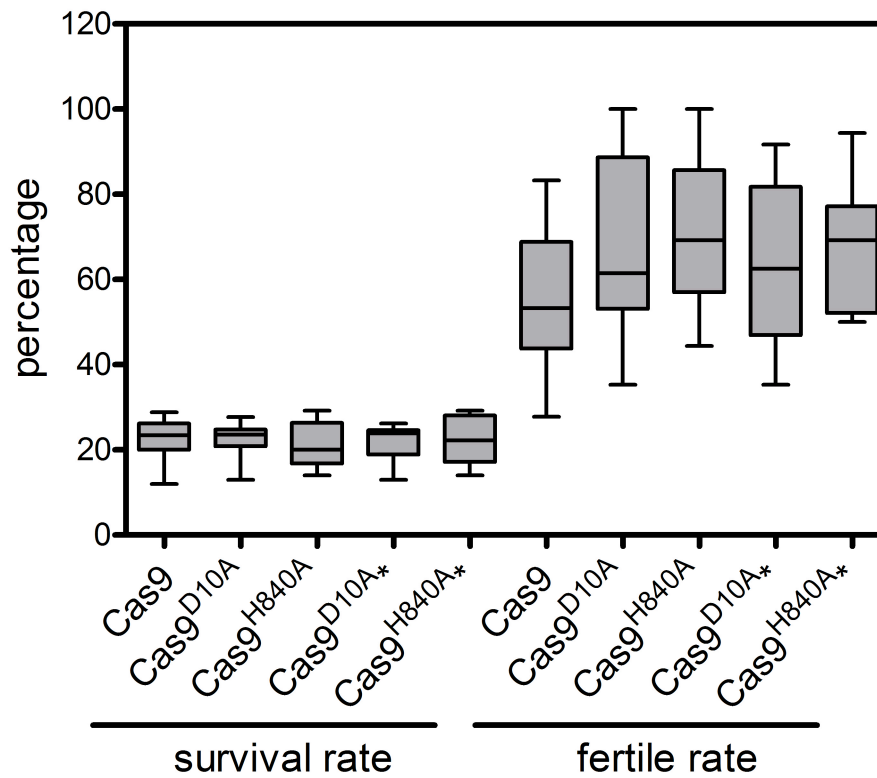

**Figure S3. No significant improvement of survival and fertile G0 rates when applying Cas9 nickase.** Using data from Table S3, the average survival and fertile G0 rates are calculated for Cas9 with one sgRNA (Cas9), or for Cas9 nickase with offset sgRNA pairs (Cas9<sup>D10A</sup> and Cas9<sup>H840A</sup>). In addition, survival and fertile G0 rates for Cas9 nickase with paired sgRNAs that successfully generated heritable mutants are also calculated (Cas9<sup>D10A\*</sup> and Cas9<sup>H840A\*</sup>). No significant differences are observed among five groups, for either survival rate or fertile rate.
