# Supplementary material for: Performance of the Cas9 Nickase System in Drosophila melanogaster
Source: PubMed Central journal article supplement (PMC4199701; doi:10.1534/g3.114.013821), 2014-08-15
Supplement: supp_g3.114.013821_FigureS4.pdf [file supp_g3.114.013821_FigureS4.pdf]

**NGG**:PAM    **N**:mismatch  
 CAATATGGACATCTTTGGGG**CGG** white-sgRNA-A  
**TATTAAGGACATCTTTGGGT**CGG**** potential off-target site A1  
  
 CAGGAGCTATTAATTCGCGG**AGG** white-sgRNA-B  
 CAGGAGCTATTAAT**GTC**CG**CCGG** potential off-target site B1  
  
 GCACAATATGGACATCTTTG**GGG** white-sgRNA-C  
**CTGAAC**ATGGACATCTTTG**CAG** potential off-target site C1  
  
 AGGTGAGGTTCTCGGCTAGT**TGG** white-sgRNA-D  
**AACTGATGAT**CTCGGCTAGT**TGG** potential off-target site D1  
**GGA**TGAGGTTCTCGGCT**GGCTGG** potential off-target site D2

**Figure S4. No off-target effect detected using the transgenic Cas9 nickase flies to generate heritable mutations.** F1 flies from three groups of successful *white* mutations using Cas9<sup>D10A</sup> flies and pairs of sgRNAs are tested. Four sgRNA on-target sequences and their corresponding potential off-target sites are listed. Genomic regions that have no more than four mismatches to the on-target and a neighboring PAM are sequenced from eight F1 white-eyed flies for each group. No mutations were detected at the potential off-targets. Mismatches between the potential off-targets and the targeted region are shown in red. The PAM sequences are in bold type.
