# Supplementary material for: Performance of the Cas9 Nickase System in Drosophila melanogaster
Source: PubMed Central journal article supplement (PMC4199701; doi:10.1534/g3.114.013821), 2014-08-15
Supplement: supp_g3.114.013821_FigureS5.pdf [file supp_g3.114.013821_FigureS5.pdf]

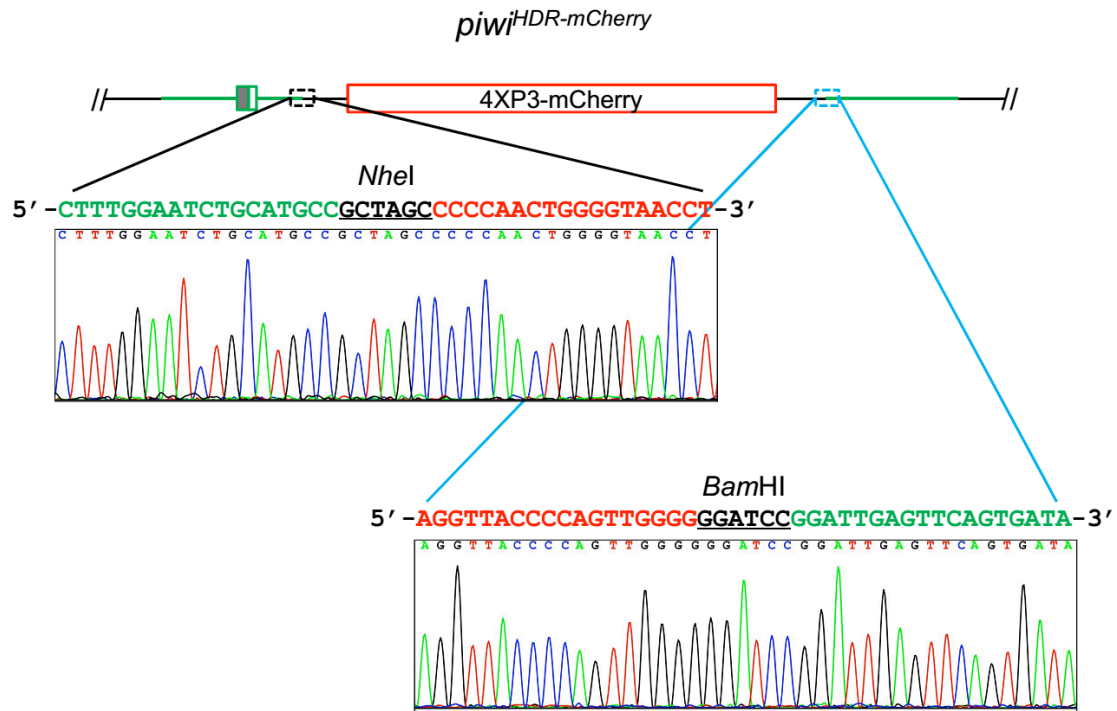

**Figure S5. Representative sequencing results at the break points of the *piwi*<sup>HDR-mCherry</sup> mutant lines.** The two boxes show parts of the sequencing results that represent the break points on the genomic DNA, with the genomic sequence in green and the 4XP3-mCherry sequence in red. Sequencing results with all six *piwi*<sup>HDR-mCherry</sup> lines show the same result.
