# Supplementary material for: Performance of the Cas9 Nickase System in Drosophila melanogaster
Source: PubMed Central journal article supplement (PMC4199701; doi:10.1534/g3.114.013821), 2014-08-15
Supplement: supp_g3.114.013821_TableS1.pdf [file supp_g3.114.013821_TableS1.pdf]

**Table S1. Sequences of the oligonucleotides for mutation detection and vector construction in this study.**

| Use                                                            | Name             | Sequence                          |
|----------------------------------------------------------------|------------------|-----------------------------------|
| Indel mutation<br>detection                                    | White-F          | TATCATTGCAGGGTGACAGCG             |
|                                                                | White-R          | GGCATTGAGCAGGGTCGTC               |
| Cas9 nickase<br>mutagenesis                                    | Cas9-D10A-F      | CTCCATTGGGCTCGCTATCGGCACAAACA     |
|                                                                | Cas9-D10A-R      | TGTTTGTGCCGATAGCGAGCCCAATGGAG     |
|                                                                | Cas9-H840A-F     | TACGACGTGGATGCTATCGTGCCCCAG       |
|                                                                | Cas9-H840A-R     | CTGGGGCACGATAGCATCCACGTCGTA       |
| <i>piwi</i> -4XP3-mCherry<br>donor template<br>homologous arms | <i>piwi</i> -L-F | GGCCTAGGTGCGGTATTTAAGGCTCTTGC     |
|                                                                | <i>piwi</i> -L-R | CTAGCTAGCGGCATGCAGATTCCAAGAC      |
|                                                                | <i>piwi</i> -R-F | CGGGATCCGGATTGAGTTCAGTGATAATATCG  |
|                                                                | <i>piwi</i> -R-R | GGACTAGTCGCAACTGAGCAATACTTTCCAC   |
| <i>piwi</i> -4XP3-mCherry<br>donor template<br>mCherry marker  | mCherry-F        | CCGCTCGAGATGGTGAGCAAGGGCGAGGA     |
|                                                                | mCherry-R        | CGGGGTACCTTACTTGTACAGCTCGTCCATGCC |
|                                                                | SV40-F           | CGGGGTACCGATCTTTGTGAAGGAACC       |
|                                                                | SV40-R           | CGGGATATCACTAGACTGGAACCAGACATG    |
| <i>piwi</i> <sup>HDR-mCherry</sup><br>confirmation             | primer 1         | TTACTTGCATAGCAGGGTGGCTG           |
|                                                                | primer 2         | CTCCGGCGCTCGTCTAGTGTCG            |
|                                                                | primer 3         | CACACCTCCCCCTGAACCTG              |
|                                                                | primer 4         | GCCTCCACCAGTTCAGACG               |
