# Supplementary material for: Performance of the Cas9 Nickase System in Drosophila melanogaster
Source: PubMed Central journal article supplement (PMC4199701; doi:10.1534/g3.114.013821), 2014-08-15
Supplement: supp_g3.114.013821_TableS2.pdf [file supp_g3.114.013821_TableS2.pdf]

**Table S2. Sequences of the oligonucleotides for off-target effect analysis.**

| primers        | Sequence (5' to 3')    |
|----------------|------------------------|
| white-OTE-A1-F | CGACACCAGCTATGGTTTCGG  |
| white-OTE-A1-R | CTCGGTATGGACCTAGAGGC   |
| white-OTE-B1-F | AACAAACAACCGCTCAACCC   |
| white-OTE-B1-R | GAATCGGGCGTAGAAGACAG   |
| white-OTE-C1-F | TGTTTCGTCGCTCCTTCCTCC  |
| white-OTE-C1-R | AGGAGCACAAGGCGAAGCAC   |
| white-OTE-D1-F | ACCAAGGGTGGATAGGTGCG   |
| white-OTE-D1-R | GGGTTGAAACTTCCTACTTGCC |
| white-OTE-D2-F | GATCTTTGGCTTCGTTTCAGG  |
| white-OTE-D2-R | TTGAACCGCCCACTGCTCC    |
| piwi-OTE-L1-F  | GAACCTGAATGCCTAATCTC   |
| piwi-OTE-L1-R  | CGATTTGACTTTGGGCAAGA   |
| piwi-OTE-L2-F  | CAACTGACCTCTTAGCCCTCG  |
| piwi-OTE-L2-R  | TAGAGCGAGATTTCCCTTGAGC |
| piwi-OTE-L3-F  | ACTGGGACCTACGATTGCC    |
| piwi-OTE-L3-R  | AAGCGAGACCGCACTACCG    |
| piwi-OTE-L4-F  | GGAGGGTAAAGGGCACGAAA   |
| piwi-OTE-L4-R  | CAATGAGTTTGCCCTTGACG   |
| piwi-OTE-L5-F  | CGATAGAAATGGGCAAAGCAAC |
| piwi-OTE-L5-R  | GTGGAGGTGGTATTTATTGCC  |
| piwi-OTE-R1-F  | GTCATTAAGTCTGGCCTGTGGG |
| piwi-OTE-R1-R  | AGGGCTCAATGTTGAACGAAGC |
| piwi-OTE-R2-F  | CATCGCATCCATGATTCCTC   |
| piwi-OTE-R2-R  | AGGCGCAAAGTATTCACCC    |
