# Supplementary material for: Performance of the Cas9 Nickase System in Drosophila melanogaster
Source: PubMed Central journal article supplement (PMC4199701; doi:10.1534/g3.114.013821), 2014-08-15
Supplement: supp_g3.114.013821_TableS3.pdf [file supp_g3.114.013821_TableS3.pdf]

**Table S3. Sequences of the oligonucleotides for off-target effect analysis.**

|                       | sgRNA name        | embryos | total G0 | fertile G0 | survival rate* | fertile rate** |
|-----------------------|-------------------|---------|----------|------------|----------------|----------------|
| Cas9                  | white-A           | 53      | 12       | 8          | 22.6%          | 66.7%          |
|                       | white-B           | 61      | 16       | 13         | 26.2%          | 81.3%          |
|                       | white-C           | 60      | 15       | 8          | 25.0%          | 53.3%          |
|                       | white-D           | 50      | 10       | 5          | 20.0%          | 50.0%          |
|                       | white-E           | 51      | 10       | 8          | 19.6%          | 80.0%          |
|                       | white-F           | 65      | 16       | 7          | 24.6%          | 43.8%          |
|                       | white-G           | 65      | 16       | 11         | 24.6%          | 68.8%          |
|                       | white-H           | 65      | 14       | 9          | 21.5%          | 64.3%          |
|                       | white-I           | 50      | 6        | 5          | 12.0%          | 83.3%          |
|                       | white-J           | 50      | 10       | 5          | 20.0%          | 50.0%          |
|                       | white-K           | 66      | 19       | 6          | 28.8%          | 31.6%          |
|                       | white-L           | 64      | 15       | 8          | 23.4%          | 53.3%          |
|                       | white-M           | 65      | 15       | 5          | 23.1%          | 33.3%          |
|                       | white-N           | 66      | 18       | 12         | 27.3%          | 66.7%          |
|                       | white-O           | 60      | 16       | 5          | 26.7%          | 31.3%          |
|                       | white-P           | 65      | 18       | 5          | 27.7%          | 27.8%          |
|                       | white-Q           | 60      | 12       | 9          | 20.0%          | 75.0%          |
| white-R               | 55                | 8       | 4        | 14.5%      | 50.0%          |                |
| white-S               | 65                | 16      | 10       | 24.6%      | 62.5%          |                |
| Cas9 <sup>D10A</sup>  | white-J + white-F | 55      | 11       | 7          | 20.0%          | 63.6%          |
|                       | white-E + white-K | 56      | 13       | 8          | 23.2%          | 61.5%          |
|                       | white-E + white-L | 60      | 15       | 9          | 25.0%          | 60.0%          |
|                       | white-E + white-F | 65      | 17       | 10         | 26.2%          | 58.8%          |
|                       | white-D + white-R | 54      | 7        | 6          | 13.0%          | 85.7%          |
|                       | white-D + white-H | 65      | 18       | 8          | 27.7%          | 44.4%          |
|                       | white-Q + white-B | 56      | 10       | 7          | 17.9%          | 70.0%          |
|                       | white-E + white-R | 68      | 16       | 11         | 23.5%          | 68.8%          |
|                       | white-D + white-I | 66      | 16       | 9          | 24.2%          | 56.3%          |
|                       | white-D + white-C | 55      | 12       | 11         | 21.8%          | 91.7%          |
|                       | white-E + white-H | 65      | 16       | 7          | 24.6%          | 43.8%          |
|                       | white-E + white-I | 65      | 16       | 9          | 24.6%          | 56.3%          |
|                       | white-E + white-A | 65      | 17       | 6          | 26.2%          | 35.3%          |
|                       | white-F + white-A | 65      | 16       | 8          | 24.6%          | 50.0%          |
|                       | white-E + white-G | 50      | 9        | 9          | 18.0%          | 100.0%         |
|                       | white-E + white-A | 55      | 13       | 13         | 23.6%          | 100.0%         |
| white-E + white-O     | 60                | 13      | 12       | 21.7%      | 92.3%          |                |
| Cas9 <sup>H840A</sup> | white-K + white-S | 65      | 17       | 9          | 26.2%          | 52.9%          |
|                       | white-F + white-L | 65      | 19       | 13         | 29.2%          | 68.4%          |
|                       | white-K + white-P | 55      | 10       | 7          | 18.2%          | 70.0%          |
|                       | white-F + white-M | 55      | 10       | 5          | 18.2%          | 50.0%          |
|                       | white-S + white-N | 65      | 18       | 17         | 27.7%          | 94.4%          |
|                       | white-E + white-F | 50      | 7        | 5          | 14.0%          | 71.4%          |
|                       | white-D + white-R | 68      | 18       | 11         | 26.5%          | 61.1%          |
|                       | white-D + white-H | 50      | 9        | 4          | 18.0%          | 44.4%          |
|                       | white-Q + white-B | 45      | 7        | 6          | 15.6%          | 85.7%          |
|                       | white-E + white-R | 45      | 7        | 6          | 15.6%          | 85.7%          |
|                       | white-D + white-C | 55      | 13       | 9          | 23.6%          | 69.2%          |
|                       | white-E + white-H | 50      | 10       | 10         | 20.0%          | 100.0%         |
|                       | white-E + white-I | 65      | 16       | 11         | 24.6%          | 68.8%          |

\*The survival rate is calculated as the percentage of total G0 adults divided by embryos injected.

\*\*The fertile rate is calculated as the percentage of fertile G0 flies divided by total G0 adults.
